# Supplementary material for: On the dynamic nature of hydrologicalsimilarity
Source: Copernicus journal article supplement (doi:10.5194/hess-2017-739), 2018-01-19
Supplement: Supplementary file [file hess-2017-739-AC1-supplement.pdf]

Reply to Referee #1 Steven Weijs:

**Steve Weijs (SV): Summary and Recommendation:** *“Generally, the paper is well-written, with interesting thoughts put forward in the discussion. I found the idea very relevant, and think there is a large potential for further work in this direction, perhaps focusing also on predictability rather than mostly on similarity. For the current paper, I have a number of comments/questions that I think would need some clarification in the paper. The comments are itemized below. I think most of the suggestions could easily be addressed/clarified in this paper, while some points may be more suitable to be addressed in further work”*

**Ralf Loritz (RL):** We would like to thank Steven Weijs for his comments, especially as his work influenced and inspired ours. In the revised manuscript we will follow many of the reviewer’s recommendations, because this will definitely improve our study. Furthermore, do we see from the comments that some parts of our study need better or more detailed explanations which we aim to provide in the revised version of our manuscript.

#### **General comments**

**1. SV line 75:** *It is mentioned that some of the energy is dissipated in runoff concentration, and the remainder is exported as kinetic energy of streamflow. I would say that the vast majority of the energy is dissipated and only a tiny remaining fraction exported. If I am not mistaken, a back of the envelope calculation with reasonable (conservative) numbers : average height of catchment above river = 100 m, 100% runoff ratio, and 2 m/s flow velocity, gives me that 99.8% of energy is not exported as kinetic energy by stream flow. To dissipate a smaller portion, we would have to build large constructions (dams, penstocks) to get more kinetic energy and utilize for hydropower, and that is usually mainly saving the in stream dissipation, not much of the dissipation from runoff concentration.*

**RL:** Very valuable point. Overland flow is in fact highly dissipative and we will stress in the revised manuscript that the specific kinetic energy export per unit volume surface runoff is small. For completeness it is worth to mention that water which infiltrates into the soil changes its energy state by adding potential energy to the system, but at the same time reduces capillary binding energy. We will rephrase the sentence to: **“The majority** of this available energy is dissipated during runoff concentration, while the remaining part is exported from the catchment as the kinetic energy of streamflow (Kleidon et al., 2013)”.

**2. SV line 154:** *I would say that in hydrology, next to resistances, there is a large influence of storages (or capacitors in an electronics analogy) in the system that would make the dynamic behaviour unique/ different between two cases with the same driver/resistance combination. Could it be that the capacitances have some relation with the resistances (e.g. through porosity and path length through soil), that explains part of the similarity?*

**RL:** We agree for the case of matrix flow. Here the resistance term (in fact the inverse of the hydraulic conductivity) and the capacity to store water against gravity are connected through the soilwater-retention and soilwater-conductivity curve. We will change the revised manuscript accordingly.

**3. SV line 222:** *Could you briefly state what criteria were used for the subdivision in hillslopes? I would say that could be quite relevant to understand possible redundancy/similarity. Is the stream network based on an algorithm or on direct observation in the field? (see e.g. Mutzner et al, 2016).*

**RL:** The stream network and the hillslopes were delineated based on a digital elevation model with a classical hydrological terrain analysis algorithm (r.watershed) in GRASS GIS (each stream segment has two corresponding hillslopes). This approach generates a stream network after the user sets a threshold for the minimum size of an exterior watershed basin. Identifying this value without any additional knowledge about the stream network is indeed difficult. We hence varied this threshold across a range of values and tried to reproduce by visual inspection an official stream network map which was available from the Luxembourg Institute of Technology (LIST). This stream network was also derived from a digital elevation model, however was furthermore also corrected based on local expert knowledge, field observations as well as on aerial photographs. We agree that there is much room for improvement and refinement here. Thanks for pointing us at the work of *Mutzner et al, 2016*. We were not aware of their work and will give their study a closer look next time before we discretize our landscape. However, while we agree that the specific results of this manuscript clearly depend on the discretization of the landscape, the overall message of the manuscript does not. Nevertheless, we again agree that it would be an interesting question to see for instance how sensitive the proposed approach is (as well as the hydrological model) on different discretizations schemes. We will rephrase this section and give some extra details how the landscape discretizations was performed.

**4. SV line 328:** *Apart from the precision of the data, another very important consideration in the number of bins chosen is how the number of bins compares to the number of data points (this is the same consideration that goes into choice of bins when presenting data in a histogram). If bins are too fine for a relatively low number of data points, this will result in values always close to  $\log(m)$ , where  $m$  is the number of data points. If too coarse, we lose information that was in the distribution. It would be helpful to mention the number of bins used for both variables, and the number of data points, to clarify that the two are in balance. Perhaps also some discussion is warranted about using constant bins over the year vs. rescaling bins every time step using the maximum model. As noted, this choice basically reflects the question of which we quantify the information contained in the answers to it.*

**6. SV line 352:** *The upper bound is not only related to the number of models, but also to the number of bins used to discretize the values. Now, if I understand well, the number of bins is unbounded, but in practice, there is only a maximum number of bins occupied (would be good to know how many). Depending on the range of the bins, in order to reach the maximum entropy, the models may need to simulate unrealistically high or low values. Therefore I have some problem with the interpretation of  $\log(N)$  as the maximum attainable entropy / state of zero spatial organization.*

**RL:** You are right, from a practical viewpoint the number of occupied bins is limited. The idea behind  $\log(N)$  (state of zero organization) is in this sense to provide a theoretical upper limit, even if our model is unable to reach this value (see also the detailed answer to Ciaran Harman).

The basic idea behind the entire approach is that as soon as two models fall in the same bin they are from a functional perspective indistinguishable. This is why we used the measurement accuracy as bin size, which is from a physical perspective a meaningful definition for the indistinguishability of two measured or simulated values. In our study this means that our 105 models will always produce redundancy simply because it is physically unrealistic that all 105 bins are occupied. However, we still believe that this theoretical perspective has some value. Simply by using a different model realization, looking at a different quantity or working in a different environment we could also reach this value in practice. Furthermore, if a model is working close to this value it tells us that the chosen spatial resolution might be coarse.

We thank the referee for this valuable comment. We will update section 3.1.2 where we introduce this idea. We will furthermore as recommend add the “maximum reachable entropy” based on a physical meaningful number of bins to our manuscript (e.g. in Figure 4) and report the maximum number of occupied bins. In a final step we will add a plot to the appendix where we try different

binning sizes to show how sensitive the approach is with respect to different bin sizes. For further details see also the answer to Ciaran Harman.

**5. SV line 334:** *It is not completely clear to me if/how the soil moisture probe uncertainty is used in the calculation of the bin width. Is it a relevant factor in the bin width if observations are not directly used to compare with the simulations?*

**RL:** The Colpach catchment is highly instrumented with a wide range of different sensors. Among others with 46 5TE soil moisture probes (for further details see Loritz et al. (2017); <https://www.metergroup.com/environment/products/ech2o-5te-electrical-conductivity/>). The manufactures of these soil moisture sensors state that the measurement accuracy of these sensors is around 1% relative water content. The soil layers in our models are 1m thick and we use a saturated water content of 0.57 %. This means that per m<sup>2</sup> we can at maximum fit 570 liter into our soil layer. We now simple transfer the error of our soil moisture observations to our storage simulations. We use a constant step size of 10mm (1%) with bins ranging from 10 mm (1%) to 570mm (57%) (maximum saturation of our soil). We think that this is a physical meaningful bin size as it represents the minimum measurement accuracy. However, we agree that we could have also come up with a different bin size depending on the question we would like to ask. We apologize that this was not clear in our manuscript in the first place and will add a sentence in the revised manuscript. Furthermore will we show in the appendix how different binning sizes change the Shannon entropy.

**7. SV line 348-350:** *I think there is also another key issue here: predictability from other hillslopes is not the same as giving identical unit runoff values. If e.g. runoff follows the same pattern with a simple scaling factor, a time shift, or any one-to-one relation, I would say the hillslopes are redundant to some extent. Giving identical runoff values is a sufficient, but not a necessary condition for providing information that is redundant.*

**9. SV line 357: precision:** *I am not sure if this statement is accurate, see point 7*

**RL:** Thank you for this comment. We agree that in general one system might be perfectly predictable from the other, even if the values fall not into the same “bin”. However, as soon as you are aware of a scaling factor or any other transfer function you could still use our approach. For instance, one could account for a scaling factor using the differences of the discharge values between the time steps instead of the absolute runoff values. In this case two hillslopes would be redundant if they show the same dynamics and not necessarily the same discharge value. Something similar could be

done a-priori if we know or assume that time series are shifted in time. In the end it depends on the question and on data availability during model execution how one defines redundancy or similarity with respect to an observed or simulated value.

**8. SV line 356:** *but attaining this maximum would also mean the rain has to be white noise spatially*

**RL:** We agree that an apparent spatial covariance of rainfall will create redundancy in the simulation ensemble and thus reduce the entropy below the maximum. We will stress this in the revised manuscript.

**10. SV line 359:** *identical : I think spatial organization/compressibility is more related to how predictable one hillslope output is from the other, rather than how identical they are, see also point 7*

**RL:** Good point. With identical we mean here “functionally identical” rather than structurally identical. We will rephrase this sentence to:

“At the other end of the spectrum, one may have a state of perfect spatial organization in which all 105 hillslope models are within the error margin of observations perfectly predictable from each other.”

Yet we think that predictability and similarity are very closely related. We think that structural similarity, i.e. similar controls of gradients and resistance terms implies functional similarity, in case these are forced by similar forcing and start at a similar state. This implies that structurally similar systems are mutually predictable.

**11. SV line 442:** *The median of all realizations is not a compressed model, since it would need calculation results from all catchments. Please clarify whether you calculated: a) the KGE of the median of the simulation outputs from the 1000 bootstrapped models or b) the median of the KGE's calculated from each bootstrapped model simulation output individually. From the text, it seems a) is done, but figure 3 suggests b). Please clarify. There are actually several points in the text where this is not completely clear (e.g. also 528), and I think it is relevant to know.*

**RL:** We apologize that this was not clear in the first place. We calculated the KGE for all 1000 randomly generated model realizations separately (the distribution in Figure 3 and 6) as well as the median KGE from all these realizations (the dotted line in Figure 3 and 6). You are hence right to

calculate the median KGE we need to run all model combinations. We discuss this point shortly in the same section where we argue that an approach to aggregate the models similar to the one shown in our own work (Loritz et al. 2017) might be the better avenue to come up with a spatially aggregated catchment model. However to keep the manuscript short and too improve the readability we chose this rather ad hoc bootstrap method. We are sorry that this was not clear and will rephrase the above mentioned sections in the revised manuscript.

**12. SV line 457 -459:** *I don't think correspondence with KGE or any other metric should be used as an argument for using NMI, because then why not just use KGE as similarity metric? Ideally, arguments for suitability should come from some desiderata for the metric, based on what you set out to measure.*

**RL:** The idea behind the comparison of the KGE and NMI was that Hydrologist are familiar with the KGE but not necessarily with the NMI. We wanted to relate the NMI to a known quantity which has proven to be sensitive to capture differences between stream flow time series. If the Editor wishes we can remove this comparison, however we still think it could be valuable for some readers which are not familiar with the NMI.

**13. SV line 465-468:** *I think another reason for decreasing entropy is the negative feedback of decreasing evaporation with decreasing storage, which stabilizes the system and drives it to some equilibrium. Any changes in storage tend to dampen out over time because of this mechanism.*

**RL:** Good point, we will try to add this to the corresponding section in the revised manuscript.

**14. SV line 478-479:** *See point 6/7.*

**15. SV line 596:** *Given points 6/7 This interpretation should be checked after comparing against the max given by the  $\log(nr \text{ of bins})$ .*

**RL:** Thank you for these comments. We hope that these points become clear in a revised manuscript and further hope that the answer to point 6, 7 and to Ciaran Harman are satisfying.

**16. SV line 620-623:** *When using mutual information as a basis for clustering, it means that hillslopes outputs within one cluster are predictable from each other, not per se that they are similar. This may be another explanation for the large differences between the bootstraps.*

**RL:** Good point. We would say they are at least partly functionally similar but not necessarily structurally similar. In our virtual environment, where we kept all aspects except geometry identical across the hillslopes, this is to a certain extent the same; in the real world not necessarily.

**Technical / minor comments**

**SV Line 15:** changed

**SV Line 144-145:** changed

**SV Line 148:** removed

**SV Line 188-190:** changed

**SV Line 310-311:** changed

**SV Line 387:** We think that your and our statement is correct here.

**SV Line 392:** We will add a sentence as well as showed an example in the appendix in a revised manuscript.

**SV Line 395-396:** We agree with the referee and will rephrase this part.

**Figure 3:** changed

**SV Line 503:** Removed the term efficiency

**SV Line 516:** changed

**SV Line 534:** Sentence removed.

**SV Line 540:** changed

**Figure 6:** We added a sentence to our results section.

**SV Line 560:** We will rephrase this sentence.

**SV Line 562:** We will add a sentence.

**SV Line 563:** removed

**SV Line 633-634:** changed

**SV Line 655:** Agreed. We removed the part “without the necessity of normalization”.

**SV Line 655:** *“I would add in paragraph 49 some statement about the relevance of the nr. of data points in the choice of binning.*

We agree with the reviewer that the point he raises is critical when estimating the Shannon entropy. However, we think we discuss this point already in section 3.1.1 right at the start of our method section. We also cite Gong et al. 2014 and Pechlivanidis et al., 2016 as reference for further information in this respect.

**SV Line 673:** removed

**SV Line 725:** Good idea we will do that.

**SV Line 729:** changed

**SV Figure 8:** We added a sentence in the Appendix. Thanks for this notice.
